# Supplementary material for: Synthesis and strong near-infrared fluorescence of LiLa1−xNdx(PO3)4 nanocrystals with high doping concentrations
Source: Royal Society of Chemistry journal article supplement (doi:10.1039/c3nr03367h), 2013-01-01
Supplement: c3nr03367h.pdf [file c3nr03367h.pdf]

**Supporting Information for**  
**Synthesis and strong near-infrared fluorescence of**  
 **$\text{LiLa}_{1-x}\text{Nd}_x(\text{PO}_3)_4$  nanocrystals with high doping**  
**concentration**

**Zhongyue Wang,<sup>a</sup> Xiaoxia Cui,\*<sup>c</sup> Ruilin Zheng,<sup>b</sup> Weikuan Duan,<sup>a</sup> Bo Peng<sup>ac</sup> and Wei Wei\*<sup>bc</sup>**

<sup>a</sup> Institute of Advanced Materials (IAM), Nanjing University of Posts and Telecommunications (NUPT), Nanjing 210023, P.R. China.

<sup>b</sup> School of Optoelectronic Engineering, Nanjing University of Posts and Telecommunications (NUPT), Nanjing 210023, P.R. China. E-mail: [iamww@fudan.edu.cn](mailto:iamww@fudan.edu.cn)

<sup>c</sup> State Key Laboratory of Transient Optics and Photonics, Xi'an Institute of Optics and Precision Mechanics, Chinese Academy of Science (CAS), Xi'an 710119, P.R. China. E-mail: [cuixx2008@163.com](mailto:cuixx2008@163.com)

## Experimental Section

**Chemicals.** HNO<sub>3</sub> (GR, 65-68%), CH<sub>4</sub>N<sub>2</sub>O (AR) and ammonia solution (GR, 25-28%) were obtained from Aladdin Chemistry Co., Ltd. Urea while LiNO<sub>3</sub> (99%), Nd(NO<sub>3</sub>)<sub>3</sub> · 6H<sub>2</sub>O (99.9%), La(NO<sub>3</sub>)<sub>3</sub> · 6H<sub>2</sub>O (99.9%) and NH<sub>4</sub>H<sub>2</sub>PO<sub>4</sub> (98%) was provided by Alfa Aesar.

**Preparation of LLNP nanocrystals.** In this work, the LLNP nanocrystals were synthesized via combustion method. Taking LiNd(PO<sub>3</sub>)<sub>4</sub> nanocrystals as an example, CH<sub>4</sub>N<sub>2</sub>O was added into 20mL aqueous solution containing 2mmol LiNO<sub>3</sub> and 2mmol Nd(NO<sub>3</sub>)<sub>3</sub> under agitation. Then the solution of 8mmol NH<sub>4</sub>H<sub>2</sub>PO<sub>4</sub> in 10 mL deionized water was added into above solution dropwise after the pH was adjusted. After drying to honeycomb in blast oven at 80°C, the precursor was treated at 750°C for 10min following combustion reaction. The collected product was washed and dried at 60°C for 48h under vacuum.

**Characterization.** The X-ray diffraction (XRD) patterns of the samples were measured on a Bruker D8 Advance X-ray powder diffractometer with graphite monochromatized Cu Ka radiation ( $k_{\alpha}=0.15405$  nm). The Fourier transform infrared (FT-IR) spectra was obtained on a Shimadzu IRPrestige-21 FT-IR spectrophotometer in the wavenumber range of 400~4000cm<sup>-1</sup> at a resolution of 2cm<sup>-1</sup>, on a pressed pellet of the powdered sample dispersed in KBr. The morphologies were characterized by a JEOL JEM-3010 transmission electron microscope (TEM) under a 300 kV working voltage. The emission spectra and luminescence decay times of all the samples were measured by full-featured steady state/transient fluorescence spectrometer FLS920 from Edinburgh Instruments.

**Table S1** Crystal data and structure refinement for NdP<sub>5</sub>O<sub>14</sub>, LiNdP<sub>4</sub>O<sub>12</sub> and

| Empirical formula                      | LiNd(PO <sub>3</sub> ) <sub>4</sub> |                                    |                                     |
|----------------------------------------|-------------------------------------|------------------------------------|-------------------------------------|
|                                        | NdP <sub>5</sub> O <sub>14</sub>    | LiNdP <sub>4</sub> O <sub>12</sub> | LiNd(PO <sub>3</sub> ) <sub>4</sub> |
| Crystal system                         | Monoclinic                          | Monoclinic                         | Monoclinic                          |
| Space Group                            | P21/a                               | I2/a                               | C2/c                                |
| Cell parameters                        | a=13.03Å,                           | a=13.25Å,                          | a=16.487Å,                          |
|                                        | b=9.001Å,                           | b=7.008Å,                          | b=7.043Å,                           |
|                                        | c=8.768Å,                           | c=9.844Å,                          | c=9.754Å,                           |
|                                        | β=90.48°                            | β=90.1°                            | β=126.46°                           |
| Volume(Å <sup>3</sup> )                | 1028.3                              | 914.1                              | 910.9                               |
| Z                                      | 4                                   | 4                                  | 4                                   |
| Density(g/cm <sup>-3</sup> )           | 3.38                                | 3.393                              | 3.406                               |
| JCPDS                                  | 24-0782                             | 29-0812                            | 34-0003                             |
| d <sub>min(Nd-Nd)</sub> (Å)            | 5.192                               | 5.62                               | 5.644                               |
| c (10 <sup>21</sup> cm <sup>-3</sup> ) | 3.88                                | 4.37                               | 4.39                                |
| τ (μs)                                 | 110                                 | 120                                | 120                                 |
| σ (10 <sup>-19</sup> cm <sup>2</sup> ) | 2.5                                 | 3.2                                | 3.2                                 |
| ref                                    | 1, 2                                | 3, 4, 5                            | 6, 7                                |

**Table S2** FT-IR spectral data ( $\text{cm}^{-1}$ ) and band assignments for  $\text{LiNd}(\text{PO}_3)_4$

| Wavenumber         | Assignment                     |
|--------------------|--------------------------------|
| 1310, 1240         | $\nu_{\text{as}}(\text{PO}_2)$ |
| 1149, 1083, 1067   | $\nu_{\text{s}}(\text{PO}_2)$  |
| 1012, 932          | $\nu_{\text{as}}(\text{POP})$  |
| 812, 754, 735, 685 | $\nu_{\text{s}}(\text{POP})$   |
| 596, 575, 560, 522 | $\delta(\text{PO}_2)$          |
| 474, 457, 436      | $\delta(\text{POP})$           |

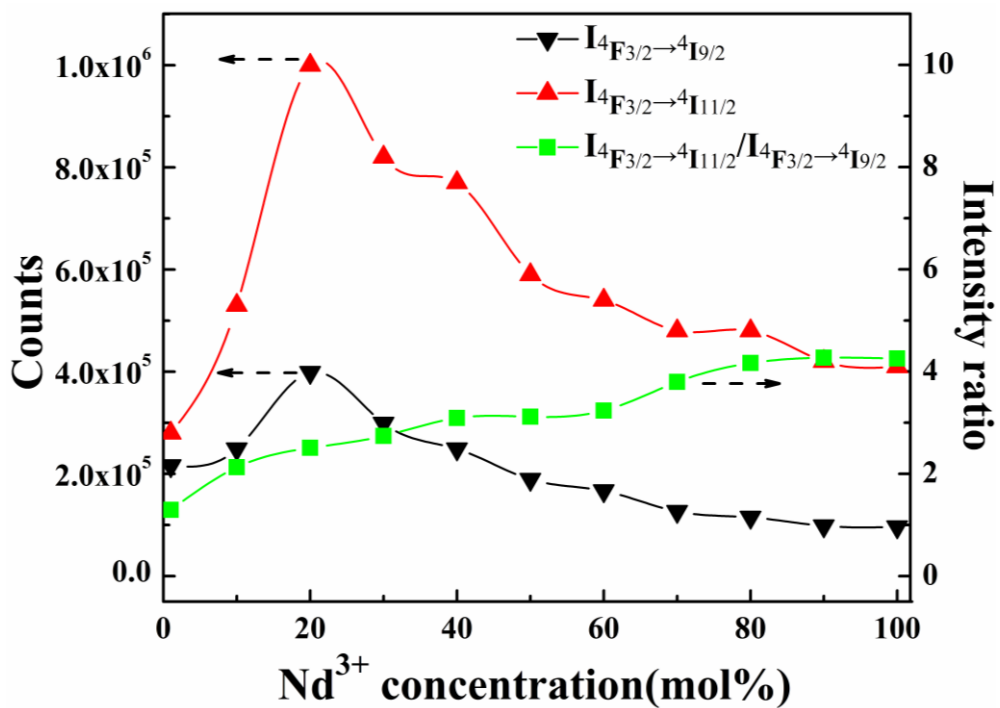

Fig.S1 Emission intensities (<sup>4</sup>F<sub>3/2</sub>→<sup>4</sup>I<sub>11/2</sub> and <sup>4</sup>F<sub>3/2</sub>→<sup>4</sup>I<sub>9/2</sub>) of LiLa<sub>1-x</sub>Nd<sub>x</sub>(PO<sub>3</sub>)<sub>4</sub> nanocrystals and their ratio dependence on the Nd<sup>3+</sup> doping concentration

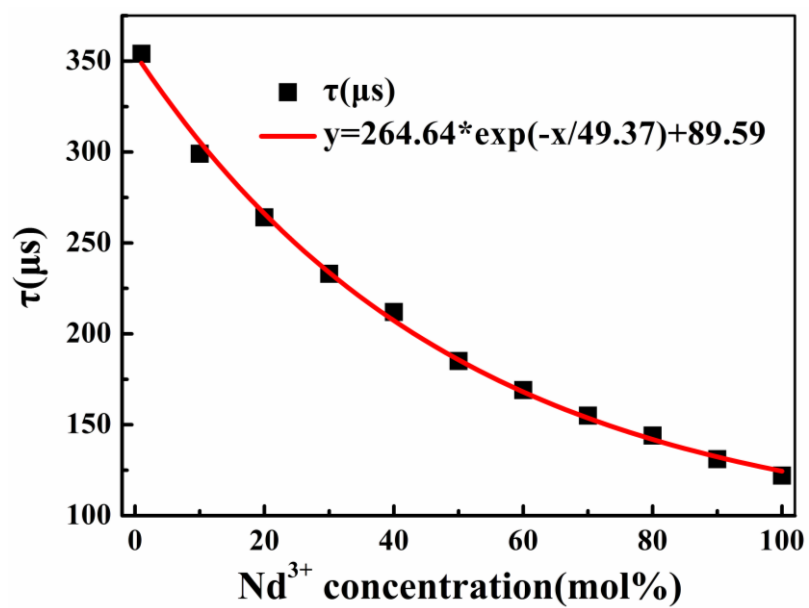

Fig.S2 The curve of fluorescence lifetimes ( $\tau$ ) dependence on  $\text{Nd}^{3+}$  concentration in  $\text{LiLa}_{1-x}\text{Nd}_x(\text{PO}_3)_4$  nanocrystals

## References

1. H. G. Danielmeyer. *Festkorperprobleme* 15. 1975, **15**,253
2. M. M. Choy, W. K. Zwicker, S. R. Chinn. *Appl. Phys.Lett.* 1979, **34**, 387
3. H. Y-P. Hong. *Mat. Res. Bull.* 1975, **10**, 635.
4. K. Otsuka, T. Yamada, M. Saruwatari, T. Kimura. *IEEE J. QE.* 1975, **11**, 330.
5. K. Kubodera, K. Otsuka, S. Miyazawa. *Appl. Opt.* 1979, **18**, 884.
6. H. Ettis, H. Naili, T. Mhiri. *J. Solid. State Chem.* 2006, **179**, 3107.
7. W. W. Kruhler, R. D. Plattner, W. Stetter. *Appl. Phys.* 1979, **20**, 329.
